# Supplementary material for: Ag6Cl4: the first silver chloride with rare Ag6clusters from anab initiostudy
Source: Royal Society of Chemistry journal article supplement (doi:10.1039/d1cc03426j), 2021-01-01
Supplement: d1cc03426j1.pdf [file d1cc03426j1.pdf]

## Electronic Supplementary Information

### Ag<sub>6</sub>Cl<sub>4</sub>: the first silver chloride with rare Ag<sub>6</sub> clusters from an *ab initio* study

Mariana Derzsi,<sup>\*a,b</sup> Matej Uhliar<sup>a</sup> and Kamil Tokár<sup>a,c</sup>

<sup>a</sup> Advanced Technologies Research Institute, Faculty of Materials Science and Technology in Trnava, Slovak University of Technology in Bratislava, Jána Bottu 8857/25, 917 24 Trnava, Slovakia.

<sup>b</sup> Centre of New Technologies, University of Warsaw, Banacha 2c, 02097 Warsaw, Poland.

<sup>c</sup> Institute of Physics, Slovak Academy of Sciences, Dúbravská cesta 9, 845 11 Bratislava, Slovakia.

\*Corresponding author: mariana.derzsi@stuba.sk

#### TABLE OF CONTENT

|                                    |       |
|------------------------------------|-------|
| E1. Computational details .....    | S2    |
| E2. Phonon dispersion curves ..... | S3    |
| E3. Phonon density of states ..... | S4    |
| E4. $\Gamma$ -point modes .....    | S5-S6 |

## E1. Computational details

The optimizations and electronic structure calculations were carried out without any symmetry constraints using DFT-GGA PBEsol functional<sup>1</sup> with added on-site electron correction on Ag *d* orbitals using DFT+U approach according to Liechtenstein<sup>2</sup> with  $U_{Ag}= 5$  eV and  $J_{Ag}= 1$  eV,<sup>3</sup> and with added Grimme correction with Becke-Jonson damping (D3)<sup>4</sup> for weaker dispersive interactions (chlorine) as implemented in VASP package.<sup>5</sup> Electronic structure was additionally calculated with hybrid DFT functional HSE06 with 25% of exact exchange<sup>6</sup> improved for the dispersive correction D3.

Lattice dynamics including phonon dispersion curves (Figures E1 and E2), phonon density of states (Figures E3 and E4) and  $\Gamma$ -point frequencies (Tables E1 and E2) was calculated using phonon direct method with supercell approach (80 atoms) in program PHONONY<sup>7</sup> on DFT-D3 and DFT-D3+U level and comparable results were obtained with both methods.

## References

- 1 G.I. Csonka, J.P. Perdew, A. Ruzsinszky, P.H.T. Philipsen, J. Lebégue, O.A. Paier, J. G. Vydrov and Ángyán, *Phys. Rev. B*, 2009, **79**, 155107.
- 2 A.I. Liechtenstein, V.I. Anisimov, J. Zaanen, *Phys. Rev. B*, 1995, **52**, R5467(R).
- 3 This set of U,J parameters has reliably reproduced experimental data for variety of systems with partially opened Ag *d* shell. See for example: (a) D. Kasinathan, K. Koepf, U. Nitzsche and H. Rosner, *Phys Rev Lett*, 2007, **99**, 247210; (b) A. Grzelak, J. Gawraczyński, T. Jaroń, D. Kurzydłowski, Z. Mazej, P. J. Leszczyński, Vitali B. Prakapenka, M. Derzsi, V. V. Struzhkin and W. Grochala, *Dalton Trans.*, 2017, **46**, 14742–14745; (c) P.J. Malinowski, M. Derzsi, Z. Mazej, Z. Jagličić, B. Gaweł, W. Łasocha and W. Grochala, *Angew. Chem. Int. Ed. Engl.*, 2010, **49**(9), 1683–1686.
- 4 S. Grimme, S. Ehrlich and L. Goerigk, *J. Comp. Chem.*, 2011, **32**, 1456.
- 5 G. Kresse and Furthmüller, *Phys Rev B*, 1996, **54**, 11169–11186.
- 6 A.V. Krukau, O.A. Vydrov, A.F. Izmaylov and G.E. Scuseria, *J. Chem. Phys.*, 2006, **125**, 224106.
- 7 A. Togo, I. Tanaka, *Scr. Mater.*, 2015, 108, 1.

## E2. Phonon dispersion curves

$\text{Ag}_6\text{Cl}_4$  was computed to be dynamically stable on both DFT-D3 and DFT-D3+U level: all frequencies are real (gain positive values).

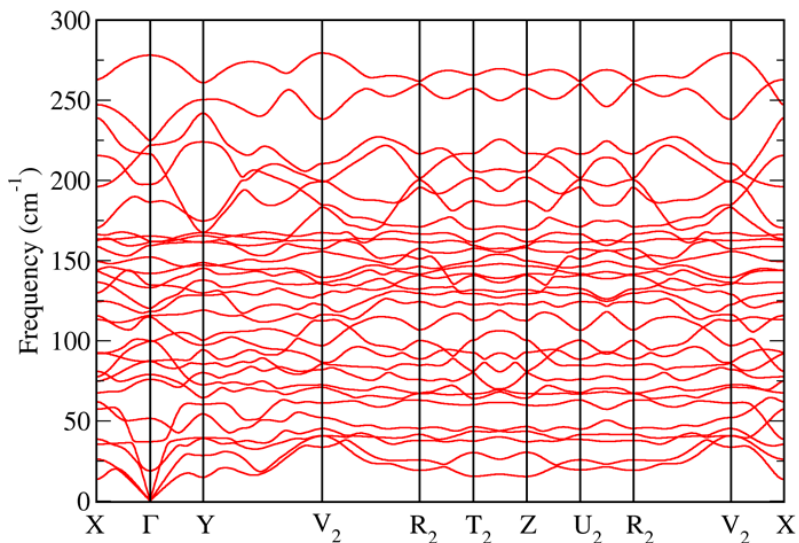

Figure E1. Phonon dispersion curves calculated for  $\text{Ag}_6\text{Cl}_4$  at DFT-D3+U level. The path in Brillouin zone: X (0.5, 0.0, 0.0),  $\Gamma$ (0.0, 0.0, 0.0), Y (0.0, 0.5, 0.0),  $V_2$  (0.5, -0.5, 0),  $R_2$  (-0.5, -0.5, 0.5),  $T_2$  (0, -0.5, 0.5), Z (0, 0, 0.5),  $U_2$  (-0.5, 0, 0.5).

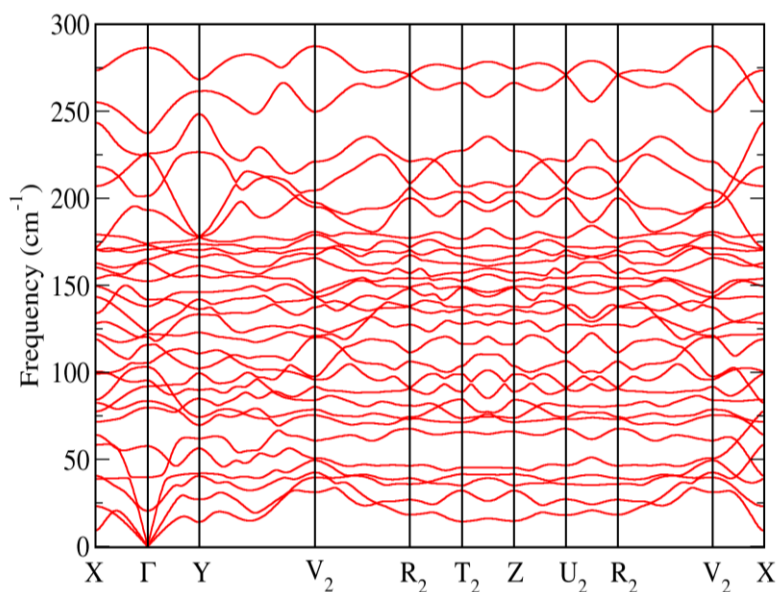

Figure E2. Phonon dispersion curves calculated for  $\text{Ag}_6\text{Cl}_4$  at DFT-D3 level. The path in Brillouin zone: as in Figure E1.

### E3. Phonon density of states

The phonon density of states of  $\text{Ag}_6\text{Cl}_4$  is spread within the range 0–280  $\text{cm}^{-1}$  with considerable contribution from Cl atoms in the entire region. The Ag vibrations dominate below 100  $\text{cm}^{-1}$  and strongly couple with Cl in the intermediate range of 100–180  $\text{cm}^{-1}$ . Comparable result is obtained on DFT-D3 and DFT-D3+U level.

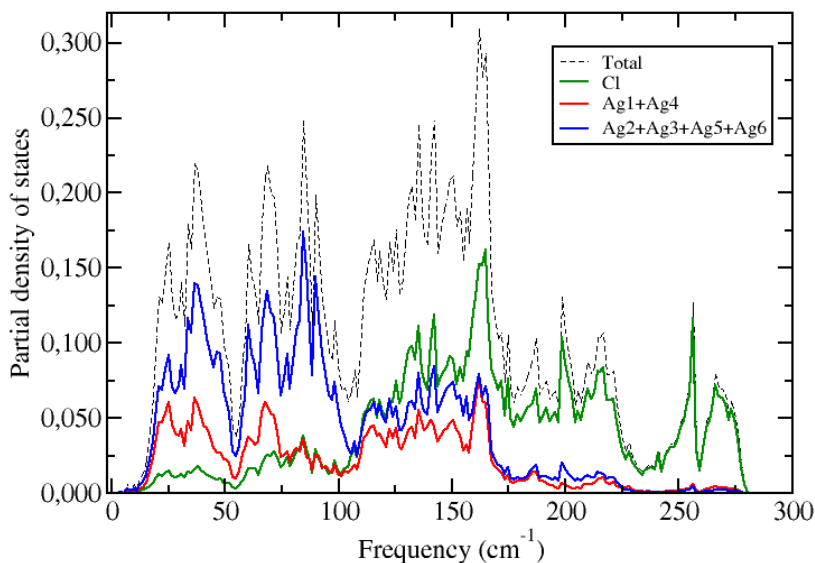

Figure E3. Atom-projected phonon density of states of  $\text{Ag}_6\text{Cl}_4$  calculated at DFT-D3+U level.

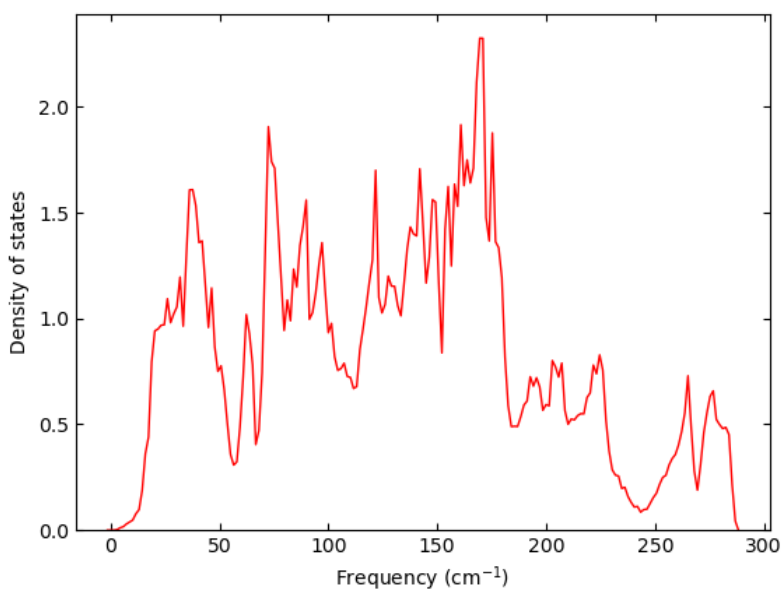

Figure E4. Phonon density of states of  $\text{Ag}_6\text{Cl}_4$  calculated at DFT-D3 level.

### E3. $\Gamma$ -point modes

Table E1. List of  $\Gamma$ -point frequencies calculated for  $\text{Ag}_6\text{Cl}_4$  at DFT-D3+U level. Irrep – irreducible representation, IR – infrared active, R – Raman active.

| Mode no. | Irrep | Optical activity | E ( $\text{cm}^{-1}$ ) |
|----------|-------|------------------|------------------------|
| 1        | Ag    | R                | 19                     |
| 2        | Ag    | R                | 37                     |
| 3        | Ag    | R                | 51                     |
| 4        | Ag    | R                | 76                     |
| 5        | Au    | IR               | 79                     |
| 6        | Au    | IR               | 87                     |
| 7        | Ag    | R                | 87                     |
| 8        | Ag    | R                | 99                     |
| 9        | Au    | IR               | 99                     |
| 10       | Ag    | R                | 115                    |
| 11       | Ag    | R                | 116                    |
| 12       | Ag    | R                | 118                    |
| 13       | Au    | IR               | 120                    |
| 14       | Au    | IR               | 133                    |
| 15       | Au    | IR               | 135                    |
| 16       | Au    | IR               | 142                    |
| 17       | Ag    | R                | 152                    |
| 18       | Au    | IR               | 159                    |
| 19       | Ag    | R                | 162                    |
| 20       | Au    | IR               | 162                    |
| 21       | Au    | IR               | 165                    |
| 22       | Ag    | R                | 186                    |
| 23       | Ag    | R                | 197                    |
| 24       | Au    | IR               | 216                    |
| 25       | Au    | IR               | 222                    |
| 26       | Ag    | R                | 225                    |
| 27       | Ag    | R                | 278                    |

Table E2.  $\Gamma$ -point frequencies calculated for  $\text{Ag}_6\text{Cl}_4$  at DFT-D3. Irrep – irreducible representation, IR – infrared active, R – Raman active.

| Mode no. | Irrep | Optical activity | E ( $\text{cm}^{-1}$ ) |
|----------|-------|------------------|------------------------|
| 1        | Ag    | R                | 20                     |
| 2        | Ag    | R                | 39                     |
| 3        | Ag    | R                | 57                     |
| 4        | Ag    | R                | 80                     |
| 5        | Au    | IR               | 83                     |
| 6        | Au    | IR               | 92                     |
| 7        | Ag    | R                | 95                     |
| 8        | Ag    | R                | 103                    |
| 9        | Au    | IR               | 105                    |
| 10       | Ag    | R                | 116                    |
| 11       | Ag    | R                | 120                    |
| 12       | Ag    | R                | 122                    |
| 13       | Au    | IR               | 124                    |
| 14       | Au    | IR               | 138                    |
| 15       | Au    | IR               | 142                    |
| 16       | Au    | IR               | 152                    |
| 17       | Ag    | R                | 163                    |
| 18       | Au    | IR               | 165                    |
| 19       | Au    | IR               | 171                    |
| 20       | Au    | IR               | 173                    |
| 21       | Ag    | R                | 174                    |
| 22       | Ag    | R                | 193                    |
| 23       | Ag    | R                | 201                    |
| 24       | Au    | IR               | 224                    |
| 25       | Au    | IR               | 226                    |
| 26       | Ag    | R                | 237                    |
| 27       | Ag    | R                | 286                    |
